# Supplementary material
Source: ML conference proceedings conference paper supplement (https://openaccess.thecvf.com/content/CVPR_2020/html/Guo_Normalized_and_Geometry-Aware_CVPR_2020_paper.html)
Supplement: Supplementary file 1 [file Guo_Normalized_and_Geometry-Aware_CVPR_2020_supplemental.pdf]

# Supplementary Material to Normalized and Geometry-Aware Self-Attention Network for Image Captioning

## 1. Visualization of Geometric Weights

To gain a better insight about the effect of the relative geometry information on attention weights, we visualize the geometric weights in GSA. Specifically, we use the content-dependent version ( $\phi^1$ ) of GSA, and use a trained one-layer G-SAN model. We visualize how the geometric weight  $\phi_{ij}^1$  between object  $i$  and  $j$  changes as the relative geometry feature  $\mathbf{f}_{ij}^g$  between them changes.

Review that the relative geometry feature  $\mathbf{f}_{ij}^g$  is a 4-dimensional vector:

$$\mathbf{f}_{ij}^g = \left( \log\left(\frac{|x_i - x_j|}{w_i}\right), \log\left(\frac{|y_i - y_j|}{h_i}\right), \log\left(\frac{w_i}{w_j}\right), \log\left(\frac{h_i}{h_j}\right) \right)^T, \quad (1)$$

where  $(x_i, y_i)$ ,  $w_i$ ,  $h_i$  are the center coordinate, width, and height of box  $i$ , respectively. We simplify the above equation as

$$\mathbf{f}_{ij}^g = (\log(\Delta x), \log(\Delta y), \log(\Delta w), \log(\Delta h))^T. \quad (2)$$

We then keep one of  $(\Delta x, \Delta y)$  and  $(\Delta w, \Delta h)$  fixed, change the other one, and see plot the values of  $\phi_{ij}^1$ .

Figure 1 shows the cases when  $\Delta w = \Delta h \in \{0.5, 1, 2\}$  are fixed, and  $\Delta x$  and  $\Delta y$  change in range of  $[0, 3]$ . We can observe that, basically, the geometric weight gets smaller when the relative distance between the two objects increases. Exceptions are found near  $(\Delta x, \Delta y) = (0, 0)$ , where the weights are relatively smaller than neighboring point. That is probably because when two boxes  $i$  and  $j$  have similar sizes, *e.g.*  $\Delta w = \Delta h = 1$ , and their center coordinates almost coincide, then they likely refer to the same object. Therefore, the weight of box  $j$  should be reduced to avoid repeating the object.

Figure 2 shows the cases when  $\Delta x = \Delta y \in \{0.5, 1, 2\}$  are fixed, and  $\Delta w$  and  $\Delta h$  change in range of  $[0, 3]$ . We have the following observations. 1) The geometric weight is small when the size difference between the two boxes is too large, *i.e.*  $\Delta w$  or  $\Delta h$  is close to 0 or too large. 2) The geometric weight tends to be larger when two objects are close to each other, *e.g.*  $(\Delta x, \Delta y) = (0.5, 0.5)$ , than when their distance is large, *e.g.*  $(\Delta x, \Delta y) = (2, 2)$ .

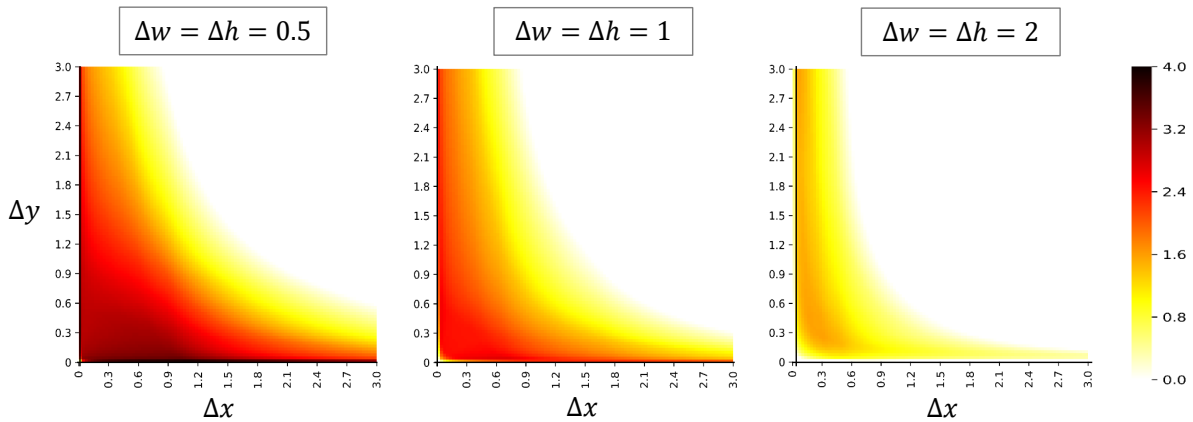

Figure 1: Visualization of the geometric weights as a function of the relative position. Each plot shows the values of  $\phi_{ij}^1$  as  $\Delta x$  and  $\Delta y$  changing in range of  $[0, 3]$ , while  $\Delta w = \Delta h \in \{0.5, 1, 2\}$  are kept fixed.

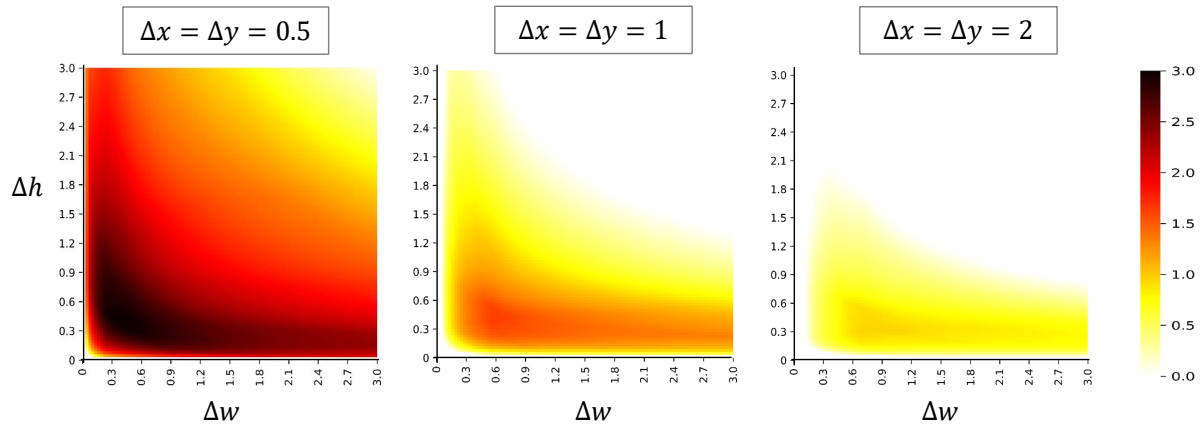

Figure 2: Visualization of the geometric weights as a function of the relative width and height. Each plot shows the values of  $\phi_{ij}^1$  as  $\Delta w$  and  $\Delta h$  changing in range of  $[0, 3]$ , while  $\Delta x = \Delta y \in \{0.5, 1, 2\}$  are kept fixed.

## 2. Examples Results of Generated Captions

To illustrate the advantages of the G-SAN relative to the SAN, we present examples generated by the two models in Figure 3. The examples show that G-SAN is more good at determining the relationships between objects. For example, in the first example, our G-SAN generates “pots and pans *hanging on* the wall”, which successfully recognizes the relationship between “pots and pans” and “wall”, *i.e.* “hanging on”.

|  |                                                                                                                                                                                                               |  |                                                                                                                                                                                                                              |
|--|---------------------------------------------------------------------------------------------------------------------------------------------------------------------------------------------------------------|--|------------------------------------------------------------------------------------------------------------------------------------------------------------------------------------------------------------------------------|
|  | <p><b>Base:</b> a kitchen with a wooden table and pots and pans</p> <p><b>Ours:</b> a kitchen with pots and pans hanging on the wall</p> <p><b>GT:</b> a wooden table in a kitchen with pots and pans</p>     |  | <p><b>Base:</b> a cat laying on top of a bed</p> <p><b>Ours:</b> a cat wearing a tie laying on a couch</p> <p><b>GT:</b> a cat wearing a neck tie laying on top of a pillow</p>                                              |
|  | <p><b>Base:</b> a cat laying on top of a stuffed teddy bear</p> <p><b>Ours:</b> a black and white cat laying in front of a white teddy bear</p> <p><b>GT:</b> A cat sleeping against a stuffed polar bear</p> |  | <p><b>Base:</b> a man riding a bike talking on a cell phone</p> <p><b>Ours:</b> a man talking on a cell phone next to a orange bike</p> <p><b>GT:</b> a man walking across a street dragging a bike</p>                      |
|  | <p><b>Base:</b> a woman cutting a cake with a knife</p> <p><b>Ours:</b> a person cutting a cake with grapes on it</p> <p><b>GT:</b> Bride and grooms arms cutting the wedding cake with fruit on top</p>      |  | <p><b>Base:</b> a man in front of a christmas tree with a dog</p> <p><b>Ours:</b> a man wearing a santa hat holding a dog in front of a christmas tree</p> <p><b>GT:</b> a man in front of a Christmas tree with his dog</p> |
|  | <p><b>Base:</b> a woman standing in a field reading a book</p> <p><b>Ours:</b> a woman standing next to a suitcase with flowers</p> <p><b>GT:</b> a cat holding a book and placing flowers on a suitcase</p>  |  | <p><b>Base:</b> a man sitting with a bunch of luggage</p> <p><b>Ours:</b> a man standing next to a pile of luggage</p> <p><b>GT:</b> a person standing next to many luggage bags</p>                                         |

Figure 3: Example captions generated by the SAN baseline (denoted as ‘Base’) and our G-SAN (denoted as ‘Ours’) models. ‘GT’ denotes one of the five ground-truth captions. G-SAN shows an improvement over SAN in determining the relationships between objects.
